# Supplementary material for: Optimizing the tribological performance of DLC-coated NBR rubber: The role of hydrogen in films
Source: Springer Nature journal article supplement (doi:10.1007/s40544-021-0498-0), 2021-06-24
Supplement: 40544_2021_498_MOESM1_ESM.pdf [file 40544_2021_498_MOESM1_ESM.pdf]

## Electronic Supplementary Material

# Optimizing the tribological performance of DLC-coated NBR rubber: The role of hydrogen in films

Changning BAI<sup>1,2,†</sup>, Li QIANG<sup>1,2,†</sup>, Bin ZHANG<sup>1,2,\*</sup>, Kaixiong GAO<sup>1</sup>, Junyan ZHANG<sup>1,2,\*</sup>

<sup>1</sup>Key Laboratory of Science and Technology on Wear and Protection of Materials, Lanzhou Institute of Chemical Physics, Chinese Academy of Sciences, Lanzhou 730000, China

<sup>2</sup>Center of Materials Science and Optoelectronics Engineering, University of Chinese Academy of Sciences, Beijing 100049, China

Supporting information to <https://doi.org/10.1007/s40544-021-0498-0>

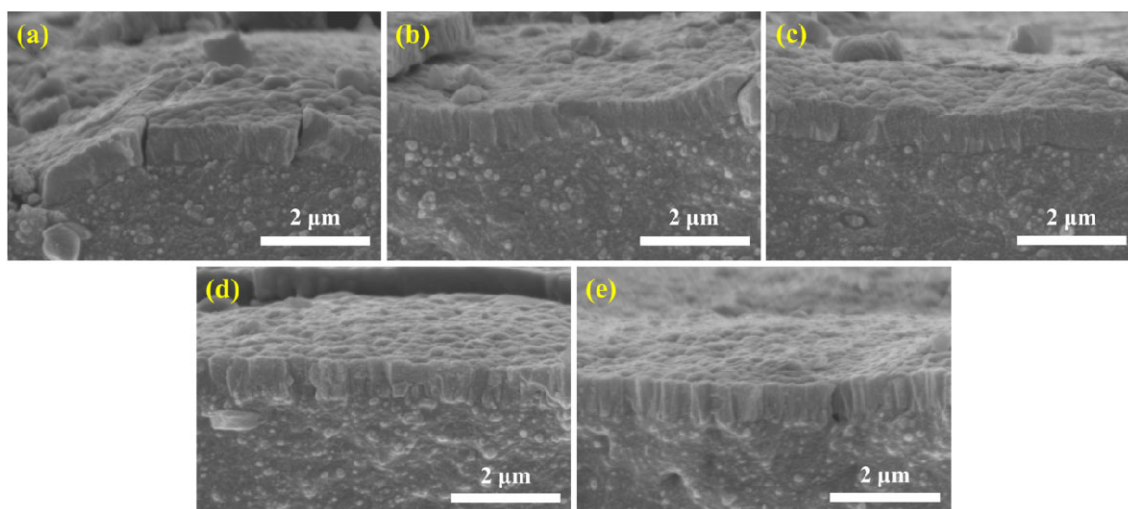

**Fig. S1** Fracture cross sections of DLC-coated NBR under different ratio of CH<sub>4</sub> and H<sub>2</sub> of (a) 1/0, (b) 2/1, (c) 1/1, (d) 2/3, and (e) 1/2.

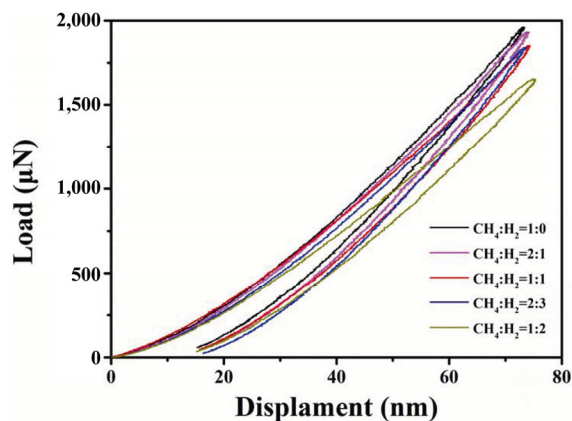

**Fig. S2** Nanoindentation load-displacement curves for DLC films with different hydrogen content deposited on Si wafer.

<sup>†</sup> Changning BAI and Li QIANG contributed equally to this work.

\* Corresponding authors: Bin ZHANG, E-mail: bzhang@licp.cas.cn; Junyan ZHANG, E-mail: zhangjunyan@licp.cas.cn
